# Supplementary material for: Cyclometallated, bis-terdentate iridium complexes as linearly expandable cores for the construction of multimetallic assemblies
Source: Royal Society of Chemistry journal article supplement (doi:10.1039/b821161b), 2009-01-01
Supplement: b821161b.pdf [file b821161b.pdf]

**Cyclometallated, bis-terdentate iridium complexes as linearly expandable cores  
for the construction of multimetallic assemblies**

*V. L. Whittle and J. A. G. Williams\**

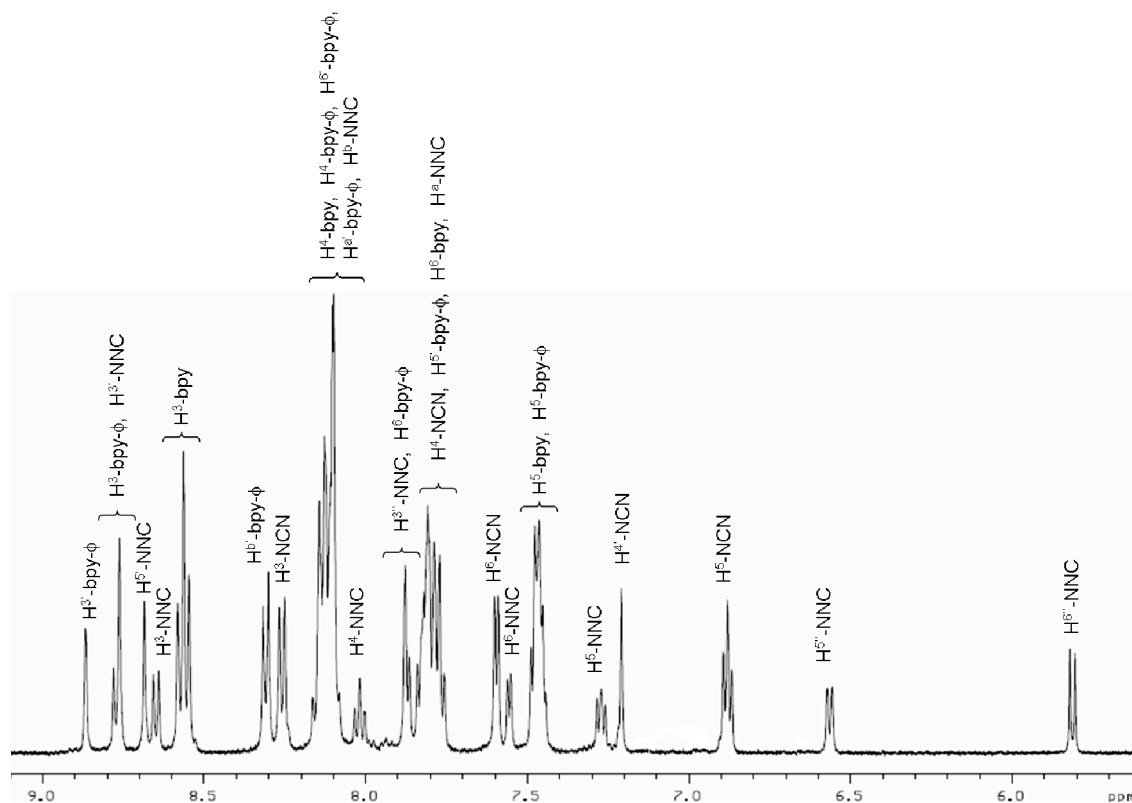

**Figure S1**  $^1\text{H}$  NMR spectrum of the Ir–Ru compound **8** in  $\text{CD}_3\text{CN}$  at 298 K, assigned on the basis of  $^1\text{H}$ - $^1\text{H}$  COSY and NOESY spectra and reference to the spectra of individual constituent complexes.

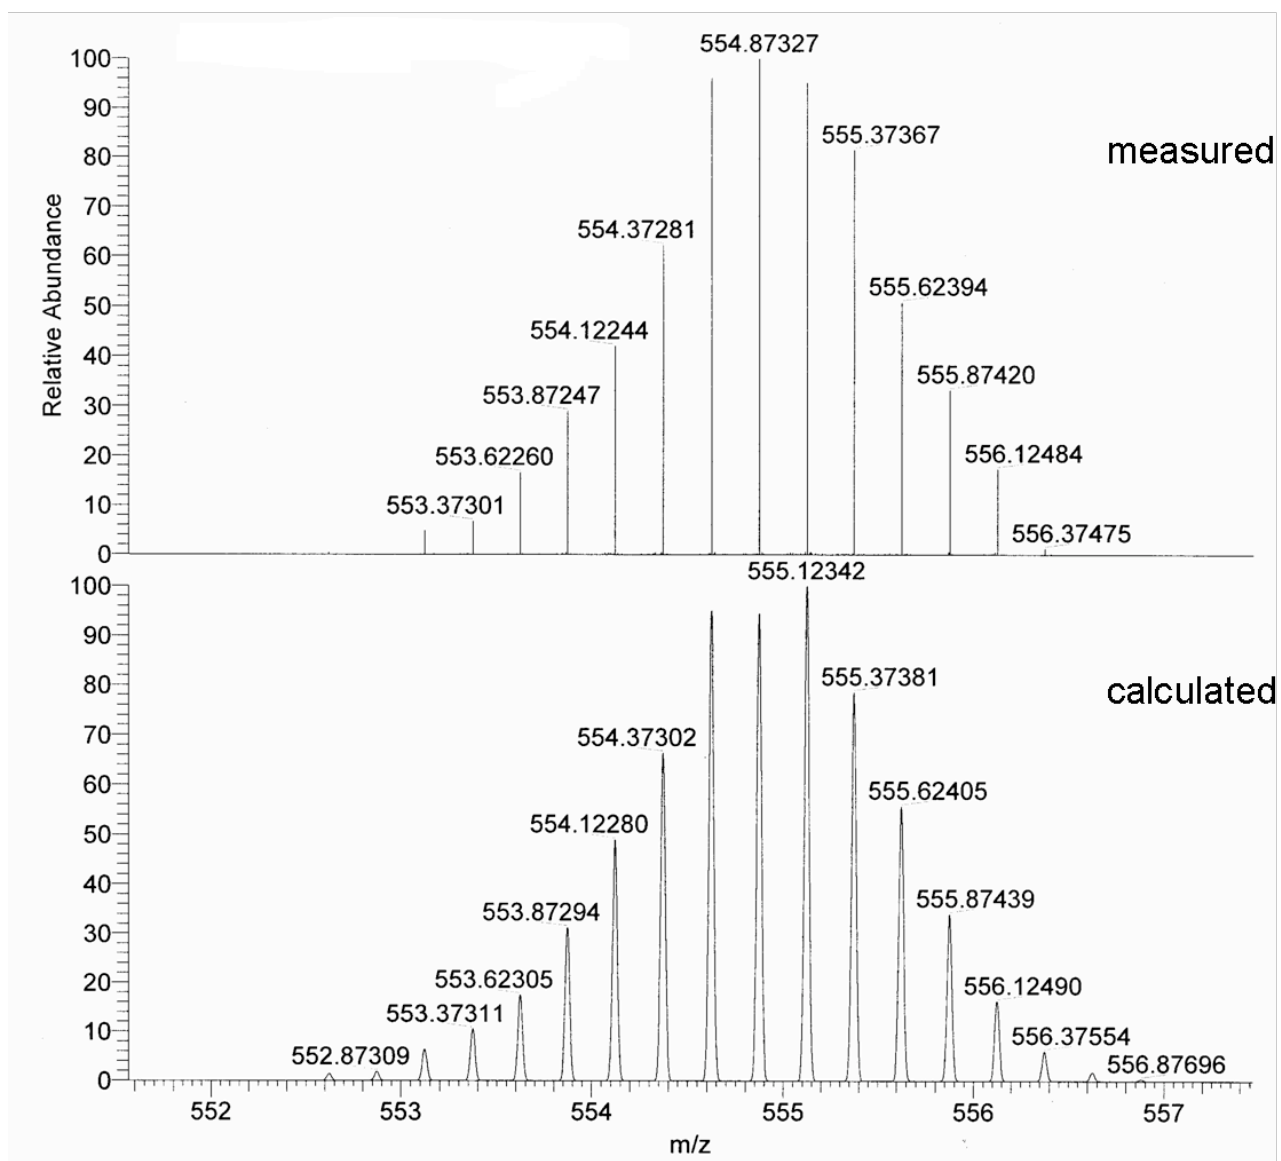

**Figure S2** Experimental high-resolution electrospray mass spectrum of the trimetallic compound **11** and the simulated spectrum for C<sub>115</sub>H<sub>80</sub>F<sub>4</sub>Ir<sub>2</sub>N<sub>14</sub>Ru.

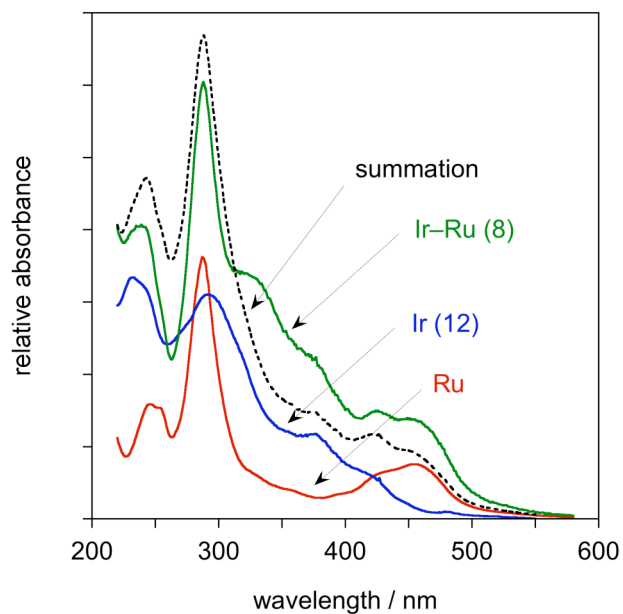

**Figure S3** Absorption spectra of the dinuclear complex **8** and the monometallic complexes  $[\text{Ir}(\text{dpyx})(\text{mtbpy}-\phi\text{-Ph})]^+$  (**12**) and  $[\text{Ru}(\text{bpy})_2(\text{bpy}-\phi\text{-Ph})]^{2+}$  (Ru), together with their summation.

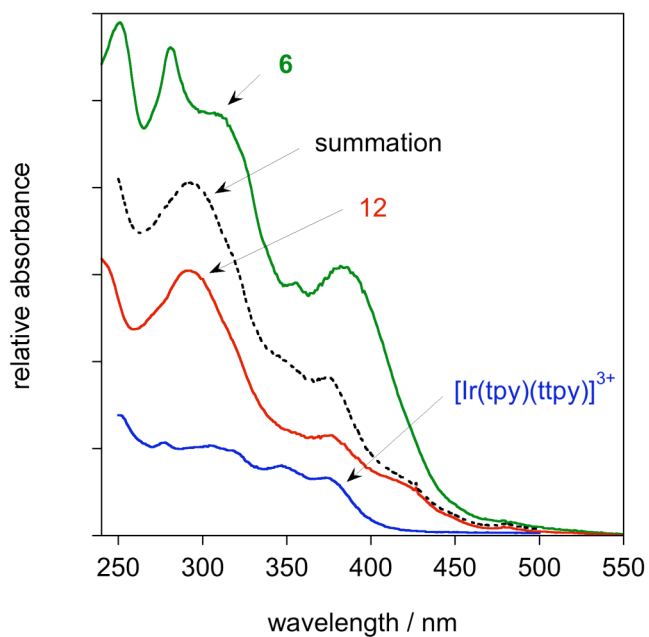

**Figure S4** Absorption spectra of the dinuclear complex **6** and the monometallic complexes  $[\text{Ir}(\text{dpyx})(\text{mtbpy}-\phi\text{-Ph})]^{3+}$  (**12**) and  $[\text{Ir}(\text{tpy})(\text{tppy})]^{3+}$ , together with their summation.

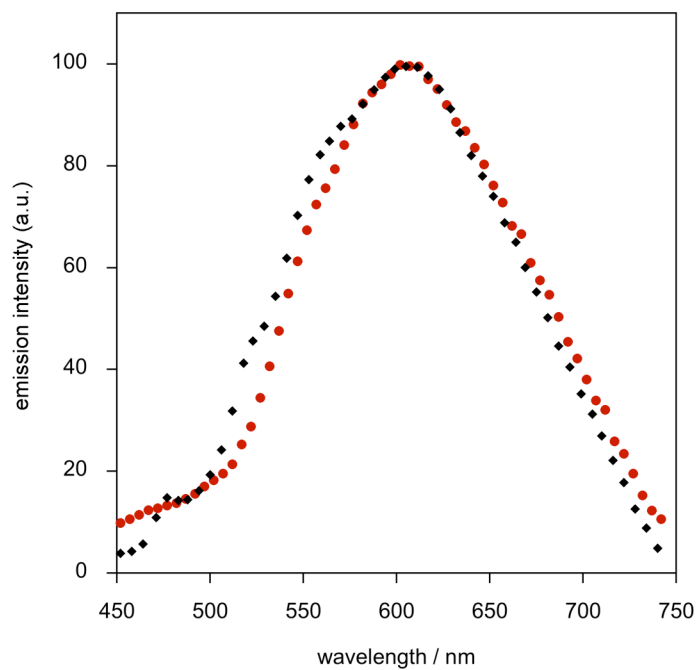

**Figure S5** Time-resolved emission spectra generated at 100 ns (red points) and at 1  $\mu$ s (black points) after excitation at 374 nm; generated from decay curves registered at 5 nm intervals.
